# Supplementary material
Source: ML conference proceedings conference paper supplement (https://proceedings.neurips.cc/paper_files/paper/2013/hash/6e7d2da6d3953058db75714ac400b584-Abstract.html)
Supplement: Supplementary file [file 6e7d2da6d3953058db75714ac400b584-Supplemental.zip]

## A Proof of theorem 1

**Theorem 1.** *An Ising model with  $J_{ij} = 0$  for  $j < i - 2$  or  $j > i + 2$ , is also a cascaded logistic model. Moreover, the parameter transformation is bijective.*

The matrix form of the cascaded logistic model is

$$W = \begin{bmatrix} h_1 & 0 & \cdots & & & & 0 \\ h_2 & w_{2,1} & 0 & \cdots & & & 0 \\ h_3 & w_{3,1} & w_{3,2} & 0 & \cdots & & 0 \\ h_4 & 0 & w_{4,2} & w_{4,3} & 0 & \cdots & 0 \\ & & & \ddots & & & \\ h_m & 0 & \cdots & & 0 & w_{m,m-2} & w_{m,m-1} \end{bmatrix} \quad (21)$$

and the probabilities for each word can be written as

$$P(x_{1:m}) = P(x_1)P(x_2|x_1) \prod_{i=1}^m P(x_i|x_{1:i-1}) \quad (22)$$

$$P(x_i|x_{1:i-1}) = P(x_i|x_{i-2}, x_{i-1}) = \frac{\exp(x_i(h_i + x_{i-1}w_{i,i-1} + x_{i-2}w_{i,i-2}))}{1 + \exp(h_i + x_{i-1}w_{i,i-1} + x_{i-2}w_{i,i-2})}. \quad (23)$$

The pentadiagonal Ising model parameters are

$$J = \begin{bmatrix} J_{1,1} & J_{1,2} & J_{1,3} & 0 & \cdots & & & 0 \\ J_{2,1} & J_{2,2} & J_{2,3} & J_{2,4} & 0 & \cdots & & 0 \\ J_{3,1} & J_{3,2} & J_{3,3} & J_{3,4} & J_{3,5} & 0 & \cdots & 0 \\ 0 & J_{4,2} & J_{4,3} & J_{4,4} & J_{4,5} & J_{4,6} & 0 & \cdots & 0 \\ & & & \ddots & & & & & \\ 0 & & & \cdots & 0 & J_{m-2,m} & J_{m-1,m} & J_{m,m} \end{bmatrix} \quad (24)$$

The map between model parameters is

$$J_{m,m} = h_m \quad (25)$$

$$J_{m-1,m} = w_{m,m-1} \quad (26)$$

$$J_{m-1,m-1} = h_{m-1} + \log \left( \frac{1 + \exp(h_m)}{1 + \exp(h_m + w_{m,m-1})} \right) \quad (27)$$

$$J_{i,i} = h_i + \log \left( \frac{1 + \exp(h_{i+1})}{1 + \exp(h_{i+1} + w_{i+1,i})} \right) + \log \left( \frac{1 + \exp(h_{i+2})}{1 + \exp(h_{i+2} + w_{i+2,i})} \right) \quad (28)$$

$$J_{i,i+1} = w_{i+1,i} + \log \left( \frac{(1 + \exp(h_{i+2} + w_{i+2,i}))(1 + \exp(h_{i+2} + w_{i+2,i+1}))}{(1 + \exp(h_{i+2}))(1 + \exp(h_{i+2} + w_{i+2,i+1} + w_{i+2,i}))} \right) \quad (29)$$

$$J_{i,i+2} = w_{i+2,i} \quad (30)$$

for  $i \in \{1, \dots, m-2\}$ .

*Proof.* We show that the parameter mapping from a cascaded logistic model defines a maximum entropy model with second order interactions for the  $m = 2$  case and use induction.

For the initial case, we check each probability.

$$\begin{aligned}
P(x_1 = 0, x_2 = 0) &= P(x_1 = 0)P(x_2 = 0|x_1 = 0) = \frac{1}{1 + \exp(h_1)} \frac{1}{1 + \exp(h_2)} \\
&= \frac{1}{1 + \exp(h_1)} \frac{1}{1 + \exp(h_2)} \exp(0) \\
P(x_1 = 0, x_2 = 1) &= P(x_1 = 0)P(x_2 = 1|x_1 = 0) = \frac{1}{1 + \exp(h_1)} \frac{h_2}{1 + \exp(h_2)} \\
&= \frac{1}{1 + \exp(h_1)} \frac{1}{1 + \exp(h_2)} \exp(d_2) \\
P(x_1 = 1, x_2 = 0) &= P(x_1 = 1)P(x_2 = 0|x_1 = 1) = \frac{\exp(h_1)}{1 + \exp(h_1)} \frac{1}{1 + \exp(h_2 + w_{2,1})} \\
&= \frac{1}{1 + \exp(h_1)} \frac{1}{1 + \exp(h_2 + w_{2,1})} \frac{1 + \exp(h_2)}{1 + \exp(h_2)} \exp(h_1) \\
&= \frac{1}{1 + \exp(h_1)} \frac{1}{1 + \exp(h_2)} \exp \left\{ h_1 + \log \left( \frac{1 + \exp(h_2)}{1 + \exp(h_2 + w_{2,1})} \right) \right\} \\
&= \frac{1}{1 + \exp(h_1)} \frac{1}{1 + \exp(h_2)} \exp(d_1) \\
P(x_1 = 1, x_2 = 1) &= P(x_1 = 1)P(x_2 = 1|x_1 = 1) = \frac{\exp(h_1)}{1 + \exp(h_1)} \frac{\exp(h_2 + w_{2,1})}{1 + \exp(h_2 + w_{2,1})} \\
&= \frac{1}{1 + \exp(h_1)} \frac{1}{1 + \exp(h_2)} \frac{(1 + \exp(h_2)) \exp(h_1) \exp(h_2 + w_{2,1})}{1 + \exp(h_2 + w_{2,1})} \\
&= \frac{1}{1 + \exp(h_1)} \frac{1}{1 + \exp(h_2)} \exp \left\{ h_1 + \log \left( \frac{1 + \exp(h_2)}{1 + \exp(h_2 + w_{2,1})} \right) + h_2 + w_{2,1} \right\} \\
&= \frac{1}{1 + \exp(h_1)} \frac{1}{1 + \exp(h_2)} \exp(d_1 + d_2 + J_{1,2})
\end{aligned}$$

With  $C = \frac{1}{1 + \exp(h_1)} \frac{1}{1 + \exp(h_2)}$ , we conclude that the cascaded logistic is equivalent to the Ising model for the  $m = 2$  case.

For the induction step, we assume that  $P_*(x_{2:m})$  is cascaded logistic and the parameter mapping gives,

$$P_*(x_{2:m}) = C_{2:m} \exp \left\{ \sum_{i=2}^m J_{i,i} x_i + \sum_{i=2}^{m-1} J_{i,i+1} x_i x_{i+1} + \sum_{i=2}^{m-2} J_{i,i+2} x_i x_{i+1} \right\} \quad (31)$$

$$C_{2:m} = \prod_{i=1}^m \frac{1}{1 + \exp(h_i)} \quad (32)$$

We extend the sparse cascaded logistic model to  $x_{1:m}$  (note the direction of the induction) so that

$$P(x_{1:m}) = P(x_1)P(x_2|x_1)P(x_3|x_2, x_1) \prod_{i=4}^m P(x_i|x_{i-1}, x_{i-2}) \quad (33)$$

When  $x_1 = 0$ , then

$$\begin{aligned}
P(x_{1:m}|x_1 = 0) &= P(x_1 = 0)P_*(x_{2:m}) \\
&= \frac{1}{1 + \exp(h_1)} P_*(x_{2:m}) \\
&= \frac{1}{1 + \exp(h_1)} C_{2:m} \exp \left\{ \sum_{i=2}^m J_{i,i} x_i + \sum_{i=2}^{m-1} J_{i,i+1} x_i x_{i+1} + \sum_{i=2}^{m-2} J_{i,i+2} x_i x_{i+1} \right\} \\
&= C_{1:m} \exp \left\{ \sum_{i=1}^m J_{i,i} x_i + \sum_{i=1}^{m-1} J_{i,i+1} x_i x_{i+1} + \sum_{i=1}^{m-2} J_{i,i+2} x_i x_{i+1} \right\}
\end{aligned}$$

For the  $x_1 = 1$  case

$$\begin{aligned}
P(x_{1:m}|x_1 = 1) &= P(x_1 = 1)P(x_2|x_1 = 1)P(x_3|x_2, x_1 = 1) \prod_{i=4}^m P(x_i|x_{i-1}, x_{i-2}) \\
&= \frac{\exp(h_1)}{1 + \exp(h_1)} \frac{\exp(x_2(h_2 + w_{2,1}))}{1 + \exp(h_2 + w_{2,1})} \frac{\exp(x_3(h_2 + x_2 w_{3,2} + w_{3,1}))}{1 + \exp(h_3 + x_2 w_{3,2} + w_{3,1})} \prod_{i=4}^m P(x_i|x_{i-1}, x_{i-2}) \\
&= \frac{\exp(h_1)}{1 + \exp(h_1)} \frac{\exp(x_2(h_2 + w_{2,1}))}{1 + \exp(h_2 + w_{2,1})} \frac{\exp(x_3(h_2 + x_2 w_{3,2} + w_{3,1}))}{1 + \exp(h_3 + x_2 w_{3,2} + w_{3,1})} \\
&\quad \cdot \frac{P_*(x_2)P_*(x_3|x_2)}{P_*(x_2)P_*(x_3|x_2)} \prod_{i=4}^m P(x_i|x_{i-1}, x_{i-2}) \\
&= \frac{\exp(h_1)}{1 + \exp(h_1)} \frac{\exp(x_2(h_2 + w_{2,1}))}{1 + \exp(h_2 + w_{2,1})} \frac{\exp(x_3(h_2 + x_2 w_{3,2} + w_{3,1}))}{1 + \exp(h_3 + x_2 w_{3,2} + w_{3,1})} \\
&\quad \cdot \frac{1 + \exp(h_2)}{\exp(x_2(h_2))} \frac{1 + \exp(h_3 + x_2 w_{3,2})}{\exp(x_3(h_3 + x_2 w_{3,2}))} P_*(x_{2:m}) \\
&= \frac{\exp(h_1)}{1 + \exp(h_1)} \exp \left\{ \log \left( \frac{1 + \exp(h_2)}{1 + \exp(h_2 + w_{2,1})} \right) + x_2 h_2 + x_2 w_{2,1} \right. \\
&\quad + \log \left( \frac{1}{1 + \exp(h_3 + w_{3,1})} \right) + x_2 \log \left( \frac{1 + \exp(h_3 + w_{3,1})}{1 + \exp(h_3 + w_{3,2} + w_{3,1})} \right) \\
&\quad + x_3 h_3 + x_2 x_3 w_{3,2} + x_3 w_{3,1} - x_2 h_2 \\
&\quad \left. + \log(1 + \exp(h_3)) + x_2 \log \left( \frac{1 + \exp(h_3 + w_{3,2})}{1 + \exp(h_3)} \right) - x_3 h_3 - x_2 x_3 w_{3,2} \right\} \\
&\quad \cdot P_*(x_{2:m}) \\
&= \exp \left\{ x_1 \left( h_1 + \log \left( \frac{1 + \exp(h_2)}{1 + \exp(h_2 + w_{2,1})} \right) + \log \left( \frac{1 + \exp(h_3)}{1 + \exp(h_3 + w_{3,1})} \right) \right) \right. \\
&\quad \left. + x_1 x_2 \left( w_{2,1} + \log \left( \frac{1 + \exp(h_3 + w_{3,1})}{1 + \exp(h_3 + w_{3,2} + w_{3,1})} \right) \right) + x_1 x_3 w_{3,1} \right\} \\
&\quad \cdot \frac{1}{1 + \exp(h_1)} P_*(x_{2:m}) \\
&= \exp \{ x_1 d_1 + x_1 x_2 J_{1,2} + x_1 x_3 J_{1,3} \} \\
&\quad \cdot \frac{1}{1 + \exp(h_1)} C_{2:m} \exp \left\{ \sum_{i=2}^m J_{i,i} x_i + \sum_{i=2}^{m-1} J_{i,i+1} x_i x_{i+1} + \sum_{i=2}^{m-2} J_{i,i+2} x_i x_{i+1} \right\} \\
&= C_{1:m} \exp \left\{ \sum_{i=1}^m J_{i,i} x_i + \sum_{i=1}^{m-1} J_{i,i+1} x_i x_{i+1} + \sum_{i=1}^{m-2} J_{i,i+2} x_i x_{i+1} \right\}
\end{aligned}$$

The reverse direction, mapping the banded Ising model into a banded cascaded logistic model, follows from the fact that the parameter mapping is invertible.  $\square$

## B Second derivatives of UBM

The second derivatives of the log-likelihood (6) are

$$\frac{\partial^2 L}{\partial \theta_i \partial \theta_j} = \alpha^2 \sum_k (\psi_1(n_k + \alpha g_k) - \psi_1(\alpha g_k)) \frac{\partial g_k}{\partial \theta_i} \frac{\partial g_k}{\partial \theta_j} + \alpha \sum_k (\psi(n_k + \alpha g_k) - \psi(\alpha g_k)) \frac{\partial^2 g_k}{\partial \theta_i \partial \theta_j} \quad (34)$$

$$\frac{\partial^2 L}{\partial^2 \alpha} = \sum_k g_k^2 (\psi_1(n_k + \alpha g_k) - \psi_1(\alpha g_k)) + \psi_1(\alpha) - \psi_1(N + \alpha), \quad (35)$$

where  $\psi_1(\cdot)$  is the trigamma function. Since  $\psi_1$  is a monotonically decreasing function, the first term is negative, while the second term is positive.
